# Supplementary material for: Secondary Resistant Mutations to Small Molecule Inhibitors in Cancer Cells
Source: PubMed Central journal article supplement (PMC7226513; doi:10.3390/cancers12040927), 2020-04-09
Supplement: cancers-12-00927-s001.pdf [file cancers-12-00927-s001.pdf]

# Supplementary Material: Secondary Resistant Mutations to Small Molecule Inhibitors in Cancer Cells

Abdulaziz B. Hamid and Ruben C. Petreaca \*

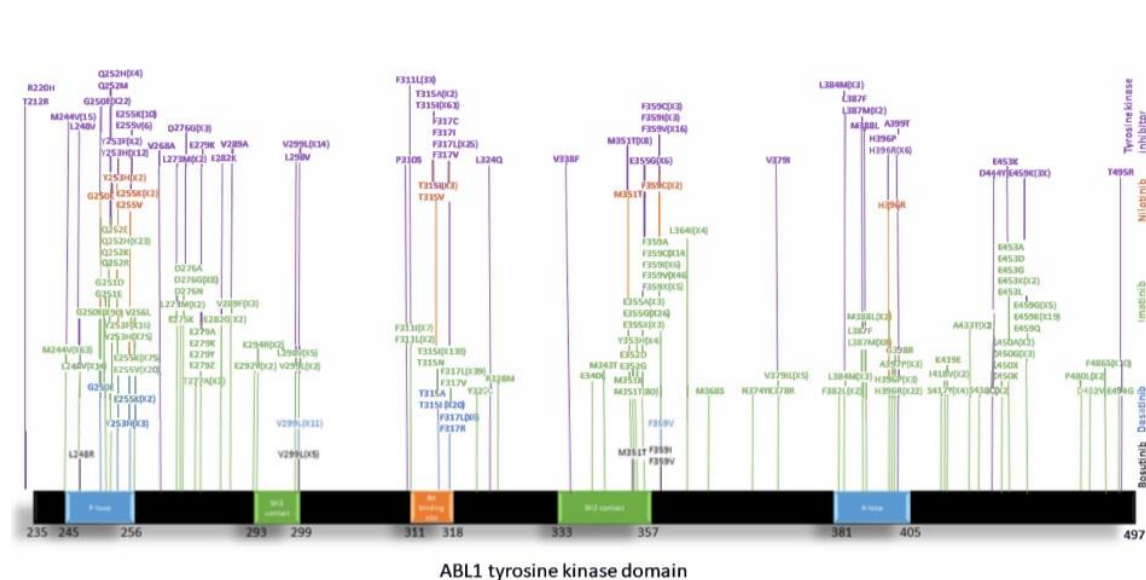

Supplementary Figure S1. Resistant mutations in the ABL1 tyrosine kinase domain.

The following tables list the resistant mutations and references deposited on COSMIC [1] and listed in the file “COSMIC Resistant Mutations” (<https://cancer.sanger.ac.uk/cosmic/download>). The file provides PubMed ID for every mutation. We searched the provided PubMed IDs and listed these references.

Supplementary Table S1. Resistant mutations in non-small cell lung cancer (NSCLC).

| Gene name                                              | Drug name                                                                         | Mutation                                                                                                            | References |
|--------------------------------------------------------|-----------------------------------------------------------------------------------|---------------------------------------------------------------------------------------------------------------------|------------|
| ALK                                                    | Alectinib                                                                         | p.V112L, p.V1180L, p.V803L                                                                                          | [2]        |
|                                                        |                                                                                   | p.I103N/S, p.I1171N/S, p.I794N/S                                                                                    | [3]        |
|                                                        |                                                                                   | p.I103N, p.I1171N, p.I794N                                                                                          | [4]        |
|                                                        | Ceritinib                                                                         | p.I1171S                                                                                                            | [5]        |
|                                                        |                                                                                   | p.G1202R, p.G134R, p.G825R                                                                                          | [6]        |
|                                                        |                                                                                   | p.F1174C/V, p.G1202R, p.G1269A, p.L1196M                                                                            | [7]        |
|                                                        |                                                                                   | p.G1123S, p.G555S, p.G746S                                                                                          | [8]        |
|                                                        |                                                                                   | p.D1203N, p.D135N, p.D826N                                                                                          | [9]        |
|                                                        |                                                                                   | p.F106L, p.F1174L, p.F797L                                                                                          | [10]       |
|                                                        |                                                                                   | p.G1202R, p.G134R, p.G825R, p.L1196M, p.L128M, p.L819M, p.S1206Y, p.S138Y, p.S829Y, p.T1151dup, p.T774dup, p.T83dup | [11]       |
| p.G1269A, p.G201A, p.G892A, p.L1196M, p.L128M, p.L819M | [12]                                                                              |                                                                                                                     |            |
| Crizotinib                                             | p.C1156Y, p.C779Y, p.C88Y, p.G1269A, p.G201A, p.G892A, p.L1196M, p.L128M, p.L819M | [13]                                                                                                                |            |
|                                                        | p.G1269A, p.S1206Y                                                                | [7]                                                                                                                 |            |
|                                                        | p.F106V, p.F1174V, p.F797V, p.G1202R, p.G134R, p.G825R                            | [14]                                                                                                                |            |
|                                                        | p.I103T, p.I1171T, p.I794T                                                        | [4]                                                                                                                 |            |
|                                                        | p.C1156Y, p.C779Y, p.C88Y, p.G1269A, p.G201A, p.G892A                             | [15]                                                                                                                |            |
|                                                        | p.G1128A, p.G60A, p.G751A                                                         | [16]                                                                                                                |            |
| EGFR                                                   | Afatinib                                                                          | p.T790M                                                                                                             | [17–20]    |

|                            |                    |                                                                                                                                        |                                        |       |
|----------------------------|--------------------|----------------------------------------------------------------------------------------------------------------------------------------|----------------------------------------|-------|
|                            |                    | p.T745M, p.T790M, c.*359C > T                                                                                                          | [21]                                   |       |
| Erlotinib                  |                    | p.T790M                                                                                                                                | [22–35]                                |       |
|                            |                    | p.T745M, p.T790M, c.*359C > T                                                                                                          | [36–42]                                |       |
| Gefitinib                  |                    | p.T790M                                                                                                                                | [23,27,33,43–80]                       |       |
|                            |                    | p.T745M, p.T790M, c.*359C > T                                                                                                          | [38,81–97]                             |       |
| HM61713                    |                    | p.D716Y, p.D761Y, p.T790M, c.*271G > T                                                                                                 | [22]                                   |       |
|                            |                    | p.C752S, p.C797S, c.*380G > C                                                                                                          | [98]                                   |       |
|                            |                    | p.C797S                                                                                                                                | [99]                                   |       |
| Osimertinib                |                    | p.L673Q, p.L718Q, c.*143T > A                                                                                                          | [97]                                   |       |
|                            |                    | p.G796D                                                                                                                                | [79]                                   |       |
|                            |                    | p.C752G, p.C752S, p.C797G/S, p.G751R/S, p.G796R/S, p.L747F/H, p.L792F/H, c.*364C>T, c.*365T>A, c.*376G>A/C, c.*379T > A/G, c.*380G > C | [42]                                   |       |
|                            |                    | p.L702P, p.L747P, c.*229_*230delinsCC                                                                                                  | [100]                                  |       |
| Not Specified TK Inhibitor |                    | p.T790M                                                                                                                                | [99, 101–106]                          |       |
|                            |                    | p.T745M, p.T790M, c.*359C > T                                                                                                          | [38]                                   |       |
| XL647                      |                    | p.T790M                                                                                                                                | [107]                                  |       |
| Afatinib                   |                    | unknown                                                                                                                                | [108]                                  |       |
| MET                        | Capmatinib         | p.D1228N, p.D1246N, p.Y1230H, p.Y1248H                                                                                                 | [78]                                   |       |
|                            |                    | p.D1228N, p.D1246N                                                                                                                     | [109]                                  |       |
|                            |                    | p.Y1230C, p.Y1248C                                                                                                                     | [110]                                  |       |
|                            | Crizotinib         |                                                                                                                                        | p.D1246H/N, p.Y1248H                   | [111] |
|                            |                    |                                                                                                                                        | p.D1228N, p.D1246N, p.Y1230H, p.Y1248H | [78]  |
|                            |                    | p.D1246N, p.G1181R, p.Y1248H/S                                                                                                         | [112]                                  |       |
|                            |                    | p.D1246H/N, p.D1249Y, p.Y1248H                                                                                                         | [80]                                   |       |
|                            | Erlotinib          | unknown                                                                                                                                | [113]                                  |       |
|                            | Gefitinib          | unknown                                                                                                                                | [78]                                   |       |
|                            | Osimertinib        | unknown                                                                                                                                | [35,80]                                |       |
| Savolitinib                | p.D1228V, p.D1246V | [108]                                                                                                                                  |                                        |       |
| KIT                        | Crizotinib         | p.D816G                                                                                                                                | [114]                                  |       |
| NF2                        | Afatinib           | p.R115*, p.R156*, p.R157*, p.R198*, c.447 + 13384C > T, c.447 + 22703A > T                                                             | [21]                                   |       |

**Supplementary Table S2.** Resistant mutations detected in cancers of the hematopoietic and lymphoid tissues.

| Gene name | Drug Name | Mutation                           | Reference                                                                                                                                 |       |
|-----------|-----------|------------------------------------|-------------------------------------------------------------------------------------------------------------------------------------------|-------|
| ABL1      | Bosutinib | p.F359V, p.M351T                   | [115]                                                                                                                                     |       |
|           |           | p.F359I, p.F378I, p.L248R, p.L267R | [116]                                                                                                                                     |       |
|           |           | p.V299L                            | [117]                                                                                                                                     |       |
|           | Dasatinib |                                    | p.F317L                                                                                                                                   | [118] |
|           |           |                                    | p.E255K, p.F317L                                                                                                                          | [119] |
|           |           |                                    | p.F317L, p.G250E, p.T315I, p.Y253H                                                                                                        | [120] |
|           |           |                                    | p.F317L, p.T315I, p.Y253H                                                                                                                 | [115] |
|           |           |                                    | p.E255K, p.T315I                                                                                                                          | [121] |
|           |           |                                    | p.F317L, p.T315I                                                                                                                          | [122] |
|           |           |                                    | p.F317R, p.F336R, p.T315A                                                                                                                 | [116] |
|           |           |                                    | p.V299L                                                                                                                                   | [117] |
|           |           |                                    | p.F359V, p.T315I, p.V299L                                                                                                                 | [123] |
|           | Imatinib  |                                    | p.E255K/V, p.E274K/V, p.H396P, p.H415P, p.T315I, p.T334I, p.Y253H, p.Y272H                                                                | [123] |
|           |           |                                    | p.E255K, p.E274K, p.F317L, p.F336L, p.G250E, p.G269E, p.M351T, p.M370T, p.T315I, p.T334I, p.Y253H, p.Y272H                                | [124] |
|           |           |                                    | p.E255K, p.E355G, p.F317L, p.F359V, p.F382L, p.G250E, p.H396R, p.L387M, p.M244V, p.M343T, p.M351T, p.Q252H/R, p.T315I, p.V379I, p.Y253F/H | [125] |

|                                                                                                                                                                                                                                                                                                |       |
|------------------------------------------------------------------------------------------------------------------------------------------------------------------------------------------------------------------------------------------------------------------------------------------------|-------|
| p.E255K/V, p.E274K/V, p.E355G, p.E374G, p.H396R, p.H415R, p.M244V, p.M263V, p.M351T, p.M370T, p.Q252H, p.Q271H, p.T315I, p.T334I, p.Y253F/H, p.Y272F/H                                                                                                                                         | [126] |
| p.E255K/V, p.E274K/V, p.E355G, p.E374G, p.E459K, p.E478K, p.F317L, p.F336L, p.F359V, p.F378V, p.F486S, p.F505S, p.G250E, p.G269E, p.H396R, p.H415R, p.L248V, p.L267V, p.M244V, p.M263V, p.M351T, p.M37.;/6y7uuuuuu650T, p.Q252H, p.Q271H, p.S417Y, p.S436Y, p.T315I, p.T334I, p.Y253F, p.Y272F | [127] |
| p.D276G, p.D295G, p.E255K/V, p.E274K/V, p.F317L, p.F359A/V, p.F378V, p.H396R, p.H415R, p.M351T,, p.M370T, p.T315I/N, p.T334I/N, p.Y253H, p.Y272H                                                                                                                                               | [128] |
| p.M351T, p.Q252E, p.Y253H                                                                                                                                                                                                                                                                      | [129] |
| p.L248V, p.L267V                                                                                                                                                                                                                                                                               | [130] |
| p.M244V                                                                                                                                                                                                                                                                                        | [118] |
| p.A433T, p.D276G, p.E255K/V, p.E292V, p.E355A/G, p.E453K, p.E459G/K/Q, p.F311I, p.F317L, p.F359C/V, p.F486S, p.G250E, p.H396R, p.L248V, p.L298V, p.L364I, p.L387M, p.M244V, p.M351T, p.M388L, p.Q252H, p.T315I, p.Y253F/H                                                                      | [131] |
| p.D482V, p.E255K, p.E279Z, p.E282G, p.E292V, p.E352D/G, p.E355G, p.E450G, p.E453D/K, p.E459G, p.F359I/V, p.F382L, p.F486S, p.G250E, p.G251D, p.H396P/R, p.I418V, p.L248V, p.L273M, p.L364I, p.L387M, p.M244V, p.M351T, p.M388L, p.Q252H, p.R328M, p.S417Y, p.T315I, p.V379I, p.Y253F/H         | [132] |
| p.E255K/V, p.E450K, p.E459K, p.F317L, p.F359C/V, p.G250E, p.H396R, p.M244V, p.M351T, p.P480L, p.S417Y, p.T315I, p.Y253H                                                                                                                                                                        | [133] |
| p.D276G, p.E255K, p.E355G, p.F311I, p.F317L, p.G250E, p.H396R, p.L248V, p.L273M, p.L384M, p.M244V, p.T315I, p.Y253F/H                                                                                                                                                                          | [134] |
| p.E355G, p.F359V, p.G250E, p.H396R, p.L248V, p.M244V, p.N374Y, p.T315I, p.Y253F/H                                                                                                                                                                                                              | [135] |
| p.F378V, p.Y272H, p.M263V, p.G269E, p.L406M, p.Q271H, p.Y272F, p.F336V, p.L267V, p.F336L, p.T334I, p.Y253H, p.F317L, p.F359V, p.Y253F, p.F317V, p.M244V, p.G250E, p.Q252H, p.L364I, p.L248V, p.L387M, p.T315I                                                                                  | [136] |
| p.E255K, p.E450A/G, p.E459K, p.F317L, p.G250E, p.T315I, p.T334I, p.Y253H                                                                                                                                                                                                                       | [137] |
| p.G250E                                                                                                                                                                                                                                                                                        | [138] |
| p.T315I, p.G250E, p.M244V, p.A397P, p.Y253H, p.F359X, p.D276G, p.L248V, p.M351T, p.E355X, p.L384M, p.E255K, p.F359V, p.F317L, p.H396R, p.E279Y, p.E450X/A, p.E453L, p.E459K, p.L298V, p.E355G, p.I418V, p.F359C                                                                                | [139] |
| p.A433T, p.E255K, p.E459K, p.F317L, p.G250E, p.M244V, p.Q252H/K, p.T315I, p.Y253H                                                                                                                                                                                                              | [119] |
| p.A397P, p.E255K/V, p.E355G, p.F311L, p.F317L, p.F359I/V, p.F486S, p.G250E, p.H396R, p.L248V, p.L298V, p.L364I, p.M244V, p.M351T, p.Q252H, p.Y253H                                                                                                                                             | [140] |
| p.E255K/V, p.E459K, p.F311I, p.F359V, p.F486S, p.G250E, p.M244V, p.Q252H, p.T315I, p.Y253F/H,                                                                                                                                                                                                  | [141] |
| p.F311I, p.F317L, p.G250E, p.K294delinsRGG, p.K313delinsRGG, p.Y253H                                                                                                                                                                                                                           | [120] |
| p.E255K/V, p.E459K, p.F317L, p.F359V, p.G250E, p.M351T, p.T315I, p.Y253H                                                                                                                                                                                                                       | [115] |
| p.E255K/V, p.E355G, p.F311I, p.F359C, p.F359I, p.F359V, p.G250E, p.L248V, p.L298V, p.M244V, p.M351T, p.Q252H, p.T315I, p.V289F, p.Y353H                                                                                                                                                        | [142] |
| p.H396P, p.H415P, p.M244V, p.M263V                                                                                                                                                                                                                                                             | [143] |
| p.Q252H, p.T315I                                                                                                                                                                                                                                                                               | [144] |
| p.E255K, p.E279K, p.E355G, p.E459K, p.F359C, p.F486S, p.G250E, p.H396R, p.K419E, p.L387M, p.M244V, p.M351T, p.Q252H, p.T315I, p.Y253H                                                                                                                                                          | [122] |
| p.F359I, p.F378I                                                                                                                                                                                                                                                                               | [116] |
| p.A399T, p.E255K/V, p.E355G, p.E450G, p.E494G, p.F317L, p.F359I/V, p.F486S, p.G250E, p.H396R, p.K378R, p.M244V, p.M351K/T, p.M351T, p.S438C, p.T277A, p.T315I, p.V256L, p.V299L, p.Y253H, p.Y320C                                                                                              | [145] |
| p.V299L                                                                                                                                                                                                                                                                                        | [117] |
| p.E255K, p.M351T, p.M370T, p.T315I, p.T334I, p.V289F, p.Y253H                                                                                                                                                                                                                                  | [146] |
| p.D276A, p.F311L, p.F317L, p.F359V, p.G250E, p.L340L, p.M244V, p.M351T, p.S417Y, p.T277A, p.T315I, p.V379I, p.Y253H                                                                                                                                                                            | [147] |

|  |  |                                                                                                                                                                                                                                                                                                                   |       |
|--|--|-------------------------------------------------------------------------------------------------------------------------------------------------------------------------------------------------------------------------------------------------------------------------------------------------------------------|-------|
|  |  | p.D276N, p.D295N, p.E255K/V, p.E274K/V, p.E279A, p.E298A, p.E355G, p.E374G, p.E453A, p.E459G, p.E472A, p.E478G, p.F317L, p.F336L, p.F359C/V, p.F378C/V, p.G250E, p.G269E, p.H396R, p.H415R, p.L387F, p.L387M, p.L406F/M, p.M244V, p.M263V, p.M351T, p.M370T, p.S438C, p.S457C, p.T315I, p.T334L, p.Y253H, p.Y272H | [148] |
|  |  | p.E255K, p.E275K, p.E355G, p.E453G, p.E459K, p.F317L, p.F359V, p.G250E, p.M351T, p.Q252H, p.Y253F/H                                                                                                                                                                                                               | [149] |
|  |  | p.A397P, p.D276G, p.E255K, p.E355A, p.E355G, p.F359C, p.G250E, p.G251E, p.H396R, p.L387M, p.M351T, p.N368S, p.T315I, p.V289F, p.Y253H                                                                                                                                                                             | [150] |
|  |  | p.E355G, p.G398R                                                                                                                                                                                                                                                                                                  | [151] |
|  |  | p.E255K, p.E274K, p.G250E, p.G269E                                                                                                                                                                                                                                                                                | [152] |
|  |  | p.G250E, p.L384M, p.V379I, p.Y253H, p.Y272H                                                                                                                                                                                                                                                                       | [153] |
|  |  | p.M351T                                                                                                                                                                                                                                                                                                           | [118] |
|  |  | p.E255K/V, p.F359C                                                                                                                                                                                                                                                                                                | [119] |
|  |  | p.G250E                                                                                                                                                                                                                                                                                                           | [115] |
|  |  | p.T315I                                                                                                                                                                                                                                                                                                           | [144] |
|  |  | p.H396R, p.Y253H                                                                                                                                                                                                                                                                                                  | [122] |
|  |  | p.T315V, p.T334V                                                                                                                                                                                                                                                                                                  | [116] |
|  |  | p.E355G, p.F317L, p.F359I, p.G250E, p.T495R, p.V299L                                                                                                                                                                                                                                                              | [154] |
|  |  | p.D444Y, p.E255K, p.E355G, p.F317L, p.G250E, p.L273M, p.T315I, p.V299L, p.V379I, p.Y253F/H, p.Y353H                                                                                                                                                                                                               | [155] |
|  |  | p.D276G, p.D295G, p.F317L, p.F336L, p.F359V, p.F378V, p.G250E, p.G269E, p.L387M, p.L406M, p.M244V, p.M263V, p.M388L, p.M407L, p.T315I, p.T334I, p.Y253H, p.Y272H                                                                                                                                                  | [156] |
|  |  | p.A399T, p.E255V, p.E282K, p.F311L, p.F317L, p.F359I, p.G250E, p.H396R, p.L384M, p.M244V, p.Q252H, p.R220H, p.T315I, p.V289A, p.V299L                                                                                                                                                                             | [157] |
|  |  | p.F317L, p.G250E, p.G269E, p.T315I, p.T334I, p.V299L                                                                                                                                                                                                                                                              | [158] |
|  |  | p.D276G, p.E279K, p.F317L, p.F359C/I/V, p.G250E, p.H396R, p.L273M, p.L387F, p.M244V, p.M351T, p.Q252H, p.T212R, p.T315I                                                                                                                                                                                           | [159] |
|  |  | p.D325G, p.E255K/V, p.E355G, p.E459K, p.F311L, p.F317C, p.F317I/L/V, p.F359C/V, p.G250E, p.H396R, p.L248V, p.L298V, p.L384M, p.L387M, p.M244V, p.M351T, p.Q252H, p.T315A/I, p.V268A, p.V299L, p.V338F, p.Y253H                                                                                                    | [160] |
|  |  | p.C481S, p.C515S, c.1039-1483T>A                                                                                                                                                                                                                                                                                  | [161] |
|  |  | p.C481F/S, p.C515F/Sc.1039-1482G>C/T                                                                                                                                                                                                                                                                              | [162] |
|  |  | c.1039-1482_1039-1481delinsCT, c.1039-1482G>C                                                                                                                                                                                                                                                                     | [163] |
|  |  | p.C481F/R/S/Y                                                                                                                                                                                                                                                                                                     | [164] |
|  |  | p.C481S, p.C515S, c.1039-1482G>C                                                                                                                                                                                                                                                                                  | [165] |
|  |  | p.T316A, p.T350A                                                                                                                                                                                                                                                                                                  | [166] |
|  |  | p.C481R/S, p.C515R/S, c.1039-1482G>C, c.1039-1483T>A/C                                                                                                                                                                                                                                                            | [167] |
|  |  | p.D835Y                                                                                                                                                                                                                                                                                                           | [168] |
|  |  | p.D835F/V/Y, p.F691L                                                                                                                                                                                                                                                                                              | [169] |
|  |  | p.F691L                                                                                                                                                                                                                                                                                                           | [170] |
|  |  | p.D835H/X/Y                                                                                                                                                                                                                                                                                                       | [171] |
|  |  | p.D835H, p.F691L                                                                                                                                                                                                                                                                                                  | [172] |
|  |  | p.D835Y                                                                                                                                                                                                                                                                                                           | [172] |

Supplemental Table S3. Resistant mutations in gastrointestinal stromal tumors (GIST) soft tissue.

| Gene Name | Drug Name  | Mutation                                                            | References |
|-----------|------------|---------------------------------------------------------------------|------------|
| ALK       | Crizotinib | p.F106L, p.F1174L, p.F797L                                          | [10]       |
| BRAF      | Imatinib   | p.V600E, p.V640E                                                    | [173]      |
|           |            | p.D716N, p.D816G, p.D820E/Y, p.N822K, p.T670I, p.V654A              | [174]      |
|           |            | p.D820Y, p.N822K, p.T670I, p.V654A, p.Y823D                         | [175]      |
| KIT       | Imatinib   | p.D816E, p.D820E/G/Y, p.N822K, p.S709F, p.T670E/L, p.V654A, p.Y823D | [176]      |
|           |            | p.C809G, p.D816H, p.D820A/E/G, p.N822K/Y, p.T670I, p.V654A, p.Y823D | [177]      |

|            |               |                                                                                                                            |                               |
|------------|---------------|----------------------------------------------------------------------------------------------------------------------------|-------------------------------|
|            |               | p.C809G, p.D816H, p.N822K, p.V654A, p.Y823D                                                                                | [178]                         |
|            |               | p.C809G, p.D816E, p.D820E/G/Y                                                                                              | [179]                         |
|            |               | p.V654A                                                                                                                    | [180]                         |
|            |               | p.A829P, p.D816H, p.D820G/Y, p.N822K/Y, p.T670I, p.V654A, p.Y823D                                                          | [181]                         |
|            |               | p.V654A                                                                                                                    | [182]                         |
|            |               | p.A829P, p.C809G, p.D816A/H, p.D820A/G/Y, p.N822K, p.T670I, p.V654A, p.Y823D                                               | [183]                         |
|            |               | p.T670I                                                                                                                    | [184]                         |
|            |               | p.D816H                                                                                                                    | [185]                         |
|            |               | p.K642E, p.Y823D                                                                                                           | [186]                         |
|            |               | p.V654A                                                                                                                    | [187]                         |
|            |               | p.A829P, p.D820Y, p.N822K, p.V654A, p.Y823D                                                                                | [188]                         |
|            |               | p.V654A                                                                                                                    | [173]                         |
|            |               | p.S821F                                                                                                                    | [189]                         |
|            |               | p.D579del, p.D820E/G/Y, p.K642E, p.K818_D820 > N, p.N680K, p.N822K/Y, p.T670E/I, p.V569_Y578del, p.V654A, p.Y578C, p.Y823D | [190]                         |
|            |               | p.N822K                                                                                                                    | [191]                         |
|            |               | p.A829P, p.V654A                                                                                                           | [192]                         |
|            |               | p.D820V/Y, p.V654A, p.Y823D                                                                                                | [193]                         |
|            | Nilotinib     | p.N655T                                                                                                                    | [194]                         |
|            | Sunitinib     | p.N822K                                                                                                                    | [195]                         |
| MAP2K1     | PD032590<br>1 | p.F129L                                                                                                                    | [196]                         |
| MAP2K2     | PD032590<br>1 | p.V215E                                                                                                                    | [196]                         |
| PDGFRA     | Imatinib      | p.D842V                                                                                                                    | [174,175,177,183,186,197–201] |
|            |               | p.D842V, p.D842_D846delinsG, p.I843_S847delinsT                                                                            | [202]                         |
| PDGFRA     | Sunitinib     | p.D842V                                                                                                                    | [189]                         |
| AC058822.1 | Imatinib      | p.D602V                                                                                                                    | [198]                         |

Supplementary Table S4. Resistant mutations in melanoma.

|        |               |                                                     |           |
|--------|---------------|-----------------------------------------------------|-----------|
|        | Dabrafenib    | c.139_1140del, c.139-?_1314+?del, c.505-?_1140+?del | [203]     |
|        |               | c.139-?_1314+?del                                   | [204]     |
| BRAF   |               | c.139_1140del, c.505-?_1140+?del                    | [203]     |
|        | Vemurafenib   | p.L505H, p.L545H, c.139_1140del                     | [205]     |
|        |               | c.139-?_1314+?del, c.981-?_?del?                    | [206]     |
|        |               | p.V47_D380del                                       | [207]     |
| CTNNB1 | Imatinib      | p.S26C, p.S33C                                      | [208]     |
| JAK1   | Pembrolizumab | p.Q503*                                             | [209]     |
| JAK2   | Pembrolizumab | c.1641+2T > G                                       | [209]     |
| MAP2K1 | Vemurafenib   | p.E203K, p.Q56P                                     | [210]     |
| MAP2K2 | Dabrafenib    | p.C125S, p.C28S, p.E110K, p.E207K                   | [211]     |
|        |               | p.Q60P                                              | [204]     |
|        | Vemurafenib   | p.F57C, c.-122T > G                                 | [203]     |
| NRAS   | Dabrafenib    | p.Q61K                                              | [212]     |
|        |               | p.G12D, p.Q61K                                      | [211]     |
|        | Vemurafenib   | p.Q61K/R                                            | [206,213] |
| PIK3CA | Vemurafenib   | p.E545K                                             | [205]     |
| PTEN   | Vemurafenib   | p.R159S                                             | [204]     |
| SMO    | Vismodegib    | p.V321M, p.W281L                                    | [214]     |
|        |               | p.D473Y, p.G497W                                    | [215]     |
|        |               | p.A459V, p.C469Y, p.T241M, p.V321M                  | [216]     |

p.D473G/H/N, p.F460L, p.H231R, p.Q477E, p.S533N, p.V321A, p.W281C,  
p.W535L/R [217]

**Supplementary Table S5.** Resistant mutations in breast cancer.

| Gene name | Drug name         | Mutation                                                                                                                                                                                   | References |
|-----------|-------------------|--------------------------------------------------------------------------------------------------------------------------------------------------------------------------------------------|------------|
| ESR1      | Endocrine therapy | p.Y276S, p.Y537S, c.*485A>C, c.851-26478A>C                                                                                                                                                | [218]      |
|           |                   | p.D277G, p.D538G, p.L275Q, p.L536Q, p.Y276S, p.Y537S, c.*482_*483delinsAG, c.*485A > C, c.*488A > G, c.851-26475A > G, c.851-26478A > C, c.851-26481_851-26480delinsAG                     | [219]      |
|           |                   | p.D538G, p.Y537S, p.Y537N/C, p.D277G, p.Y276N/C/S, c.*484T > A, c.*485A > C, c.*485A > G, c.*488A > G, c.851-26475A > G, c.851-26478A > C/G, c.851-26479T > A                              | [220]      |
|           |                   | p.D277G, p.D538G, c.*488A>G, c.851-26475A>G                                                                                                                                                | [221]      |
|           |                   | p.D538G, p.Y537S                                                                                                                                                                           | [222]      |
|           |                   | p.D538G, p.Y537C/N/S                                                                                                                                                                       | [223]      |
|           |                   | p.D538G, p.L536_D538>P, p.Y537C/N/S                                                                                                                                                        | [224]      |
|           |                   | p.Y276N, p.Y537N, c.*484T > A, c.851-26479T > A                                                                                                                                            | [225]      |
|           |                   | p.D277G, p.D538G, p.L275H, p.L536H, p.Y276C/N/S, p.Y537C/N/S, c.*482T > A, c.*484T > A, c.*485A > C/G, c.*488A > G, c.851-26475A>G, c.851-26478A > C/G, c.851-26479T > A, c.851-26481T > A | [226]      |
| MAP2K1    | PD0325901         | p.L115P                                                                                                                                                                                    | [196]      |
| MTOR      | Rapamycin         | p.F2108L                                                                                                                                                                                   | [227]      |

**Supplementary Table S6.** Androgen receptor (AR) resistant mutations in prostate cancer.

| Drug name    | Mutation                                                               | References |
|--------------|------------------------------------------------------------------------|------------|
| Abiraterone  | p.H733R, p.T346A, p.T695A, p.T878A                                     | [228]      |
|              | p.H733Q/R, p.T346A, p.T346S, p.T695A, p.T695S, p.T878A/S               | [229]      |
| Androgen     | p.V184M, p.V526M, p.V716M                                              | [230]      |
|              | p.H733R, p.T346A, p.T695A, p.T878A                                     | [228]      |
|              | p.H733R, p.T346A, p.T695A, p.T878A                                     | [231]      |
| Enzalutamide | p.F345L, p.F694L, p.F877L, p.H733R, p.T346A, p.T695A, p.T878A, p.V732A | [231]      |
|              | p.T878A                                                                | [232]      |
| Flutamide    | p.H733Q, p.T346S, p.T695S, p.T878S                                     | [233]      |
|              | p.H733R, p.T346A, p.T695A, p.T878A                                     | [234]      |
|              | p.H733R, p.Q109*, p.Q451*, p.Q641*, p.T346A, p.T695A, p.T878A          | [235]      |
|              | p.V184M, p.V526M, p.V716M                                              | [236]      |
| Ketoconazole | p.H733R, p.T346A, p.T695A, p.T878A                                     | [228]      |
| LHRH         | p.H733R, p.T346A, p.T695A, p.T878A                                     | [237]      |

**Supplementary Table S7.** Resistant mutations detected in other tissues.

| Gene Name | Drug Name     | AA Mutation                        | Primary Tissue         | References |
|-----------|---------------|------------------------------------|------------------------|------------|
| MET       | PF-04217903   | Not specified                      | kidney                 | [238]      |
| MTOR      | Everolimus    | p.F313L, p.F2108L                  | thyroid                | [239]      |
| SMO       | Vismodegib    | p.D473H                            | central nervous system | [240]      |
| BRAF      | Dabrafenib    | c.139-?_1314+?del                  | NS                     | [241]      |
| MAP2K1    | Vemurafenib   | p.C121S                            | NS                     | [242]      |
|           |               | p.G128V, p.P124L, p.V60E           | NS                     | [243]      |
| MAP2K2    | Dabrafenib    | p.L46F, p.N126D, p.N29D, c.-156C>T | NS                     | [243]      |
|           | Vemurafenib   | p.C125S, p.C28S, p.V35M, c.-189G>A | NS                     | [243]      |
| NRAS      | Pembrolizumab | p.Q61/HK/R                         | NS                     | [243–245]  |

## Vemurafenib

## References

1. Tate, J.G., et al., *COSMIC: the Catalogue Of Somatic Mutations In Cancer*. *Nucleic Acids Res*, 2019. **47**(D1): p. D941-D947.
2. Katayama, R., et al., *Two novel ALK mutations mediate acquired resistance to the next-generation ALK inhibitor alectinib*. *Clinical cancer research : an official journal of the American Association for Cancer Research*, 2014. **20**(22): p. 5686-96.
3. Ou, S.-H.I., et al., *Identification of a novel HIP1-ALK fusion variant in Non-Small-Cell Lung Cancer (NSCLC) and discovery of ALK I1171 (I1171N/S) mutations in two ALK-rearranged NSCLC patients with resistance to Alectinib*. *Journal of thoracic oncology : official publication of the International Association for the Study of Lung Cancer*, 2014. **9**(12): p. 1821-5.
4. Toyokawa, G., et al., *Secondary mutations at I1171 in the ALK gene confer resistance to both Crizotinib and Alectinib*. *Journal of thoracic oncology : official publication of the International Association for the Study of Lung Cancer*, 2014. **9**(12): p. e86-7.
5. Ou, S.-H., et al., *ALK F1174V mutation confers sensitivity while ALK I1171 mutation confers resistance to alectinib. The importance of serial biopsy post progression*. *Lung cancer (Amsterdam, Netherlands)*, 2016. **91**: p. 70-2.
6. Lin, Y.-T., et al., *Anaplastic Lymphoma Kinase (ALK) Kinase Domain Mutation Following ALK Inhibitor(s) Failure in Advanced ALK Positive Non-Small-Cell Lung Cancer: Analysis and Literature Review*. *Clinical lung cancer*, 2016. **17**(5): p. e77-e94.
7. Friboulet, L., et al., *The ALK inhibitor ceritinib overcomes crizotinib resistance in non-small cell lung cancer*. *Cancer discovery*, 2014. **4**(6): p. 662-673.
8. Toyokawa, G., et al., *Identification of a Novel ALK G1123S Mutation in a Patient with ALK-rearranged Non-small-cell Lung Cancer Exhibiting Resistance to Ceritinib*. *Journal of thoracic oncology : official publication of the International Association for the Study of Lung Cancer*, 2015. **10**(7): p. e55-7.
9. Wang, H.-Y., C.-C. Ho, and J.-Y. Shih, *Multiple Acquired Resistance Mutations of the ALK Tyrosine Kinase Domain after Sequential Use of ALK Inhibitors*. *Journal of thoracic oncology : official publication of the International Association for the Study of Lung Cancer*, 2017. **12**(5): p. e49-e51.
10. Sasaki, T., et al., *The neuroblastoma-associated F1174L ALK mutation causes resistance to an ALK kinase inhibitor in ALK-translocated cancers*. *Cancer Res*, 2010. **70**(24): p. 10038-43.
11. Katayama, R., et al., *Mechanisms of acquired crizotinib resistance in ALK-rearranged lung Cancers*. *Science translational medicine*, 2012. **4**(120): p. 120ra17.
12. Kim, S., et al., *Heterogeneity of genetic changes associated with acquired crizotinib resistance in ALK-rearranged lung cancer*. *J Thorac Oncol*, 2013. **8**(4): p. 415-22.
13. Huang, D., et al., *Multiplexed deep sequencing analysis of ALK kinase domain identifies resistance mutations in relapsed patients following crizotinib treatment*. *Genomics*, 2013. **102**(3): p. 157-62.
14. Ignatius Ou, S.-H., et al., *Next-generation sequencing reveals a Novel NSCLC ALK F1174V mutation and confirms ALK G1202R mutation confers high-level resistance to alectinib (CH5424802/RO5424802) in ALK-rearranged NSCLC patients who progressed on crizotinib*. *Journal of thoracic oncology : official publication of the International Association for the Study of Lung Cancer*, 2014. **9**(4): p. 549-53.
15. Saber, A., et al., *Genomic Aberrations in Crizotinib Resistant Lung Adenocarcinoma Samples Identified by Transcriptome Sequencing*. *PloS one*, 2016. **11**(4): p. e0153065.
16. Ai, X., et al., *Next generation sequencing reveals a novel ALK G1128A mutation resistant to crizotinib in an ALK-Rearranged NSCLC patient*. *Lung cancer (Amsterdam, Netherlands)*, 2018. **123**: p. 83-86.
17. Murakami, H., et al., *Phase I study of continuous afatinib (BIBW 2992) in patients with advanced non-small cell lung cancer after prior chemotherapy/erlotinib/gefitinib (LUX-Lung 4)*. *Cancer Chemother Pharmacol*, 2012. **69**(4): p. 891-9.
18. Kim, Y., et al., *The EGFR T790M mutation in acquired resistance to an irreversible second-generation EGFR inhibitor*. *Mol Cancer Ther*, 2012. **11**(3): p. 784-91.
19. Wu, S.G., et al., *The mechanism of acquired resistance to irreversible EGFR tyrosine kinase inhibitor-afatinib in lung adenocarcinoma patients*. *Oncotarget*, 2016. **7**(11): p. 12404-13.
20. Campo, M., et al., *Acquired Resistance to First-Line Afatinib and the Challenges of Prearranged Progression Biopsies*. *J Thorac Oncol*, 2016. **11**(11): p. 2022-2026.

21. Pirazzoli, V., et al., *Acquired resistance of EGFR-mutant lung adenocarcinomas to afatinib plus cetuximab is associated with activation of mTORC1*. *Cell Rep*, 2014. **7**(4): p. 999-1008.
22. Balak, M.N., et al., *Novel D761Y and common secondary T790M mutations in epidermal growth factor receptor-mutant lung adenocarcinomas with acquired resistance to kinase inhibitors*. *Clin Cancer Res*, 2006. **12**(21): p. 6494-501.
23. Sequist, L.V., et al., *Genotypic and histological evolution of lung cancers acquiring resistance to EGFR inhibitors*. *Sci Transl Med*, 2011. **3**(75): p. 75ra26.
24. Querings, S., et al., *Benchmarking of mutation diagnostics in clinical lung cancer specimens*. *PLoS One*, 2011. **6**(5): p. e19601.
25. Lund-Iversen, M., et al., *Clinicopathological characteristics of 11 NSCLC patients with EGFR-exon 20 mutations*. *J Thorac Oncol*, 2012. **7**(9): p. 1471-3.
26. Sakai, A., K. Kasahara, and T. Sone, *Detection of EGFR T790M Mutation in Pericardial Effusion from a Non-Small Cell Lung Cancer Patient with Erlotinib Therapy*. *Case Rep Oncol*, 2013. **6**(1): p. 15-20.
27. Ogata, M., et al., *Spatial and temporal genetic heterogeneity of epidermal growth factor receptor gene status in a patient with non-small cell lung cancer: a case report*. *J Med Case Rep*, 2011. **5**: p. 553.
28. Scher, K.S., et al., *EGFR-mutated lung cancer with T790M-acquired resistance in the brain and histologic transformation in the lung*. *J Natl Compr Canc Netw*, 2013. **11**(9): p. 1040-4.
29. Li, S., et al., *Response to pemetrexed rechallenge after acquired resistance of EGFR-TKI in a patient with advanced NSCLC*. *Lung Cancer*, 2014. **84**(2): p. 203-5.
30. Bordi, P., et al., *Overcoming T790M-driven acquired resistance to EGFR-TKIs in NSCLC with afatinib: a case report*. *Tumori*, 2014. **100**(1): p. e20-3.
31. Phelps, M.A., et al., *Erlotinib in African Americans with advanced non-small cell lung cancer: a prospective randomized study with genetic and pharmacokinetic analyses*. *Clin Pharmacol Ther*, 2014. **96**(2): p. 182-91.
32. Furugen, M., et al., *An Autopsy Case of Two Distinct, Acquired Drug Resistance Mechanisms in Epidermal Growth Factor Receptor-mutant Lung Adenocarcinoma: Small Cell Carcinoma Transformation and Epidermal Growth Factor Receptor T790M Mutation*. *Intern Med*, 2015. **54**(19): p. 2491-6.
33. Belchis, D.A., et al., *Heterogeneity of resistance mutations detectable by nextgeneration sequencing in TKI-treated lung adenocarcinoma*. *Oncotarget*, 2016. **7**(29): p. 45237-45248.
34. Fujita, K., et al., *Concomitant T790M mutation and small-cell lung cancer transformation after acquired resistance to epidermal growth factor receptor-tyrosine kinase inhibitor*. *Respirol Case Rep*, 2017. **5**(1): p. e00206.
35. York, E.R., et al., *Tolerable and Effective Combination of Full-Dose Crizotinib and Osimertinib Targeting MET Amplification Sequentially Emerging after T790M Positivity in EGFR-Mutant Non-Small Cell Lung Cancer*. *J Thorac Oncol*, 2017. **12**(7): p. e85-e88.
36. Ruppert, A.M., et al., *EGFR-TKI and lung adenocarcinoma with CNS relapse: interest of molecular follow-up*. *Eur Respir J*, 2009. **33**(2): p. 436-40.
37. Clarke, J.L., et al., *High dose weekly erlotinib achieves therapeutic concentrations in CSF and is effective in leptomeningeal metastases from epidermal growth factor receptor mutant lung cancer*. *J Neurooncol*, 2010. **99**(2): p. 283-6.
38. Nakamura, T., et al., *A noninvasive system for monitoring resistance to epidermal growth factor receptor tyrosine kinase inhibitors with plasma DNA*. *J Thorac Oncol*, 2011. **6**(10): p. 1639-48.
39. van Riel, S., et al., *A patient with simultaneously appearing adenocarcinoma and small-cell lung carcinoma harbouring an identical EGFR exon 19 mutation*. *Ann Oncol*, 2012. **23**(12): p. 3188-9.
40. Rieux, C., et al., *[Biological diagnosis of resistance to erlotinib in a malignant pleural effusion]*. *Rev Mal Respir*, 2013. **30**(7): p. 572-5.
41. Lozano, M.D., et al., *Variations in molecular profile in NSCLC can be analyzed using cytological samples: development of EGFR resistance mutations and coexistence of ALK-EML4 translocation in an EGFR-sensitive patient*. *Int J Surg Pathol*, 2015. **23**(2): p. 111-5.
42. Ou, S.I., et al., *Emergence of novel and dominant acquired EGFR solvent-front mutations at Gly796 (G796S/R) together with C797S/R and L792F/H mutations in one EGFR (L858R/T790M) NSCLC patient who progressed on osimertinib*. *Lung Cancer*, 2017. **108**: p. 228-231.
43. Helfrich, B.A., et al., *Antitumor activity of the epidermal growth factor receptor (EGFR) tyrosine kinase inhibitor gefitinib (ZD1839, Iressa) in non-small cell lung cancer cell lines correlates with gene copy number and EGFR mutations but not EGFR protein levels*. *Clin Cancer Res*, 2006. **12**(23): p. 7117-25.



44. Okabe, T., et al., *Differential constitutive activation of the epidermal growth factor receptor in non-small cell lung cancer cells bearing EGFR gene mutation and amplification*. *Cancer Res*, 2007. **67**(5): p. 2046-53.
45. Costa, D.B., et al., *BIM mediates EGFR tyrosine kinase inhibitor-induced apoptosis in lung cancers with oncogenic EGFR mutations*. *PLoS Med*, 2007. **4**(10): p. 1669-79; discussion 1680.
46. Yang, C.H., et al., *Specific EGFR mutations predict treatment outcome of stage IIIB/IV patients with chemotherapy-naive non-small-cell lung cancer receiving first-line gefitinib monotherapy*. *J Clin Oncol*, 2008. **26**(16): p. 2745-53.
47. Wu, S.G., et al., *Lung adenocarcinoma with good response to erlotinib after gefitinib treatment failure and acquired T790M mutation*. *J Thorac Oncol*, 2008. **3**(4): p. 451-2.
48. Wu, J.Y., et al., *Lung cancer with epidermal growth factor receptor exon 20 mutations is associated with poor gefitinib treatment response*. *Clin Cancer Res*, 2008. **14**(15): p. 4877-82.
49. Sugio, K., et al., *Prospective phase II study of gefitinib in non-small cell lung cancer with epidermal growth factor receptor gene mutations*. *Lung Cancer*, 2009. **64**(3): p. 314-8.
50. Ushiki, A., et al., *Genetic heterogeneity of EGFR mutation in pleomorphic carcinoma of the lung: response to gefitinib and clinical outcome*. *Jpn J Clin Oncol*, 2009. **39**(4): p. 267-70.
51. Kalikaki, A., et al., *Comparison of EGFR and K-RAS gene status between primary tumours and corresponding metastases in NSCLC*. *Br J Cancer*, 2008. **99**(6): p. 923-9.
52. Donovan, M.J., et al., *A systems pathology model for predicting overall survival in patients with refractory, advanced non-small-cell lung cancer treated with gefitinib*. *Eur J Cancer*, 2009. **45**(8): p. 1518-26.
53. Katayama, T., et al., *Efficacy of erlotinib for brain and leptomeningeal metastases in patients with lung adenocarcinoma who showed initial good response to gefitinib*. *J Thorac Oncol*, 2009. **4**(11): p. 1415-9.
54. Uramoto, H., et al., *Epithelial-mesenchymal transition in EGFR-TKI acquired resistant lung adenocarcinoma*. *Anticancer Res*, 2010. **30**(7): p. 2513-7.
55. Ready, N., et al., *Chemoradiotherapy and gefitinib in stage III non-small cell lung cancer with epidermal growth factor receptor and KRAS mutation analysis: cancer and leukemia group B (CALEB) 30106, a CALGB-stratified phase II trial*. *J Thorac Oncol*, 2010. **5**(9): p. 1382-90.
56. Price, K.A., et al., *Phase II trial of gefitinib and everolimus in advanced non-small cell lung cancer*. *J Thorac Oncol*, 2010. **5**(10): p. 1623-9.
57. Heon, S., et al., *Development of central nervous system metastases in patients with advanced non-small cell lung cancer and somatic EGFR mutations treated with gefitinib or erlotinib*. *Clin Cancer Res*, 2010. **16**(23): p. 5873-82.
58. Suda, K., et al., *Reciprocal and complementary role of MET amplification and EGFR T790M mutation in acquired resistance to kinase inhibitors in lung cancer*. *Clin Cancer Res*, 2010. **16**(22): p. 5489-98.
59. Uramoto, H., et al., *Expression of selected gene for acquired drug resistance to EGFR-TKI in lung adenocarcinoma*. *Lung Cancer*, 2011. **73**(3): p. 361-5.
60. Hata, A., et al., *Do complex mutations of the epidermal growth factor receptor gene reflect intratumoral heterogeneity?* *J Thorac Oncol*, 2011. **6**(6): p. 1144-6.
61. Yano, S., et al., *Hepatocyte growth factor expression in EGFR mutant lung cancer with intrinsic and acquired resistance to tyrosine kinase inhibitors in a Japanese cohort*. *J Thorac Oncol*, 2011. **6**(12): p. 2011-7.
62. Su, K.Y., et al., *Pretreatment epidermal growth factor receptor (EGFR) T790M mutation predicts shorter EGFR tyrosine kinase inhibitor response duration in patients with non-small-cell lung cancer*. *J Clin Oncol*, 2012. **30**(4): p. 433-40.
63. Tabara, K., et al., *Loss of activating EGFR mutant gene contributes to acquired resistance to EGFR tyrosine kinase inhibitors in lung cancer cells*. *PLoS One*, 2012. **7**(7): p. e41017.
64. Uramoto, H., et al., *Prognostic value of acquired resistance-related molecules in Japanese patients with NSCLC treated with an EGFR-TKI*. *Anticancer Res*, 2012. **32**(9): p. 3785-90.
65. Iwanaga, K., et al., *The long-term survival of a patient with adenosquamous lung carcinoma harboring EGFR-activating mutations who was treated with gefitinib*. *Intern Med*, 2012. **51**(19): p. 2771-4.
66. Sato, K., et al., *CBDCA + Pemetrexed + Bevacizumab and Its Maintenance Chemotherapy in a Case of Solitary Breast Metastasis from a Lung Adenocarcinoma Resistant to Gefitinib*. *Case Rep Oncol*, 2012. **5**(3): p. 546-53.
67. Hata, A., et al., *Does T790M disappear? Successful gefitinib rechallenge after T790M disappearance in a patient with EGFR-mutant non-small-cell lung cancer*. *J Thorac Oncol*, 2013. **8**(3): p. e27-9.
68. Kim, E.Y., et al., *Repeated favorable responses to epidermal growth factor receptor-tyrosine kinase inhibitors in a case of advanced lung adenocarcinoma*. *Tuberc Respir Dis (Seoul)*, 2013. **74**(3): p. 129-33.
69. Keam, B., et al., *Rare and complex mutations of epidermal growth factor receptor, and efficacy of tyrosine kinase inhibitor in patients with non-small cell lung cancer*. *Int J Clin Oncol*, 2014. **19**(4): p. 594-600.

70. Ji, W., et al., *Mechanisms of acquired resistance to EGFR-tyrosine kinase inhibitor in Korean patients with lung cancer*. BMC Cancer, 2013. **13**: p. 606.
71. Kim, H.R., et al., *Prediction for response duration to epidermal growth factor receptor-tyrosine kinase inhibitors in EGFR mutated never smoker lung adenocarcinoma*. Lung Cancer, 2014. **83**(3): p. 374-82.
72. Ohara, S., et al., *Brain metastasis effectively treated with erlotinib following the acquisition of resistance to gefitinib: a case report*. J Med Case Rep, 2014. **8**: p. 64.
73. Li, H., et al., *Primary concomitant EGFR T790M mutation predicted worse prognosis in non-small cell lung cancer patients*. Onco Targets Ther, 2014. **7**: p. 513-24.
74. Wang, Y.F., et al., *Lung adenocarcinoma harboring L858R and T790M mutations in epidermal growth factor receptor, with poor response to gefitinib: A case report*. Oncol Lett, 2014. **8**(3): p. 1039-1042.
75. Suda, K., et al., *Small cell lung cancer transformation and T790M mutation: complimentary roles in acquired resistance to kinase inhibitors in lung cancer*. Sci Rep, 2015. **5**: p. 14447.
76. Vallee, A., et al., *Rapid clearance of circulating tumor DNA during treatment with AZD9291 of a lung cancer patient presenting the resistance EGFR T790M mutation*. Lung Cancer, 2016. **91**: p. 73-4.
77. Jukna, A., et al., *Squamous Cell Carcinoma "Transformation" Concurrent with Secondary T790M Mutation in Resistant EGFR-Mutated Adenocarcinomas*. J Thorac Oncol, 2016. **11**(4): p. e49-51.
78. Li, A., et al., *Acquired MET Y1248H and D1246N Mutations Mediate Resistance to MET Inhibitors in Non-Small Cell Lung Cancer*. Clin Cancer Res, 2017. **23**(16): p. 4929-4937.
79. Zheng, D., et al., *EGFR G796D mutation mediates resistance to osimertinib*. Oncotarget, 2017. **8**(30): p. 49671-49679.
80. Kang, J., et al., *Osimertinib and Cabozantinib Combinatorial Therapy in an EGFR-Mutant Lung Adenocarcinoma Patient with Multiple MET Secondary-Site Mutations after Resistance to Crizotinib*. J Thorac Oncol, 2018. **13**(4): p. e49-e53.
81. Kobayashi, S., et al., *EGFR mutation and resistance of non-small-cell lung cancer to gefitinib*. N Engl J Med, 2005. **352**(8): p. 786-92.
82. Shih, J.Y., C.H. Gow, and P.C. Yang, *EGFR mutation conferring primary resistance to gefitinib in non-small-cell lung cancer*. N Engl J Med, 2005. **353**(2): p. 207-8.
83. Uramoto, H., et al., *Epidermal growth factor receptor mutations are associated with gefitinib sensitivity in non-small cell lung cancer in Japanese*. Lung Cancer, 2006. **51**(1): p. 71-7.
84. Jackman, D.M., et al., *Response and resistance in a non-small-cell lung cancer patient with an epidermal growth factor receptor mutation and leptomeningeal metastases treated with high-dose gefitinib*. J Clin Oncol, 2006. **24**(27): p. 4517-20.
85. Kosaka, T., et al., *Analysis of epidermal growth factor receptor gene mutation in patients with non-small cell lung cancer and acquired resistance to gefitinib*. Clin Cancer Res, 2006. **12**(19): p. 5764-9.
86. Uramoto, H., et al., *Resistance to gefitinib*. Int J Clin Oncol, 2006. **11**(6): p. 487-91.
87. Ichihara, S., et al., *The impact of epidermal growth factor receptor gene status on gefitinib-treated Japanese patients with non-small-cell lung cancer*. Int J Cancer, 2007. **120**(6): p. 1239-47.
88. Soh, J., et al., *EGFR mutation status in pleural fluid predicts tumor responsiveness and resistance to gefitinib*. Lung Cancer, 2007. **56**(3): p. 445-8.
89. Ogino, A., et al., *Emergence of epidermal growth factor receptor T790M mutation during chronic exposure to gefitinib in a non small cell lung cancer cell line*. Cancer Res, 2007. **67**(16): p. 7807-14.
90. Miyazawa, H., et al., *Peptide nucleic acid-locked nucleic acid polymerase chain reaction clamp-based detection test for gefitinib-refractory T790M epidermal growth factor receptor mutation*. Cancer Sci, 2008. **99**(3): p. 595-600.
91. Chen, H.J., et al., *Clinicopathologic and molecular features of epidermal growth factor receptor T790M mutation and c-MET amplification in tyrosine kinase inhibitor-resistant Chinese non-small cell lung cancer*. Pathol Oncol Res, 2009. **15**(4): p. 651-8.
92. Onitsuka, T., et al., *Acquired resistance to gefitinib: the contribution of mechanisms other than the T790M, MET, and HGF status*. Lung Cancer, 2010. **68**(2): p. 198-203.
93. Kubo, T., et al., *Efficacy of a lumbo-peritoneal shunt for meningeal carcinomatosis refractory to gefitinib treatment*. Anticancer Res, 2009. **29**(7): p. 2759-60.
94. Zhao, J., et al., *Restriction endonuclease-mediated real-time digestion-PCR for somatic mutation detection*. Int J Cancer, 2013. **132**(12): p. 2858-66.
95. Graziano, P., et al., *EGFR-Driven Behavior and Intrapatient T790M Mutation Heterogeneity of Non-Small-Cell Carcinoma With Squamous Histology*. J Clin Oncol, 2015. **33**(31): p. e115-8.

96. Peng, L., Z.G. Song, and S.C. Jiao, *Efficacy analysis of tyrosine kinase inhibitors on rare non-small cell lung cancer patients harboring complex EGFR mutations*. *Sci Rep*, 2014. **4**: p. 6104.
97. Bersanelli, M., et al., *L718Q Mutation as New Mechanism of Acquired Resistance to AZD9291 in EGFR-Mutated NSCLC*. *J Thorac Oncol*, 2016. **11**(10): p. e121-3.
98. Song, H.N., et al., *Acquired C797S Mutation upon Treatment with a T790M-Specific Third-Generation EGFR Inhibitor (HM61713) in Non-Small Cell Lung Cancer*. *J Thorac Oncol*, 2016. **11**(4): p. e45-7.
99. Thress, K.S., et al., *Acquired EGFR C797S mutation mediates resistance to AZD9291 in non-small cell lung cancer harboring EGFR T790M*. *Nat Med*, 2015. **21**(6): p. 560-2.
100. Huang, J., et al., *Non-small cell lung cancer harboring a rare EGFR L747P mutation showing intrinsic resistance to both gefitinib and osimertinib (AZD9291): A case report*. *Thorac Cancer*, 2018. **9**(6): p. 745-749.
101. Oxnard, G.R., et al., *Acquired resistance to EGFR tyrosine kinase inhibitors in EGFR-mutant lung cancer: distinct natural history of patients with tumors harboring the T790M mutation*. *Clin Cancer Res*, 2011. **17**(6): p. 1616-22.
102. Ohashi, K., et al., *Lung cancers with acquired resistance to EGFR inhibitors occasionally harbor BRAF gene mutations but lack mutations in KRAS, NRAS, or MEK1*. *Proc Natl Acad Sci U S A*, 2012. **109**(31): p. E2127-33.
103. Shien, K., et al., *Acquired resistance to EGFR inhibitors is associated with a manifestation of stem cell-like properties in cancer cells*. *Cancer Res*, 2013. **73**(10): p. 3051-61.
104. Sun, J.M., et al., *Clinical implications of T790M mutation in patients with acquired resistance to EGFR tyrosine kinase inhibitors*. *Lung Cancer*, 2013. **82**(2): p. 294-8.
105. Hata, A., et al., *Rebiopsy of non-small cell lung cancer patients with acquired resistance to epidermal growth factor receptor-tyrosine kinase inhibitor: Comparison between T790M mutation-positive and mutation-negative populations*. *Cancer*, 2013. **119**(24): p. 4325-32.
106. Jin, Y., et al., *Mutational profiling of non-small-cell lung cancer patients resistant to first-generation EGFR tyrosine kinase inhibitors using next generation sequencing*. *Oncotarget*, 2016. **7**(38): p. 61755-61763.
107. Pietanza, M.C., et al., *Phase II study of the multitargeted tyrosine kinase inhibitor XL647 in patients with non-small-cell lung cancer*. *J Thorac Oncol*, 2012. **7**(5): p. 856-65.
108. Bahcall, M., et al., *Acquired METD1228V Mutation and Resistance to MET Inhibition in Lung Cancer*. *Cancer Discov*, 2016. **6**(12): p. 1334-1341.
109. Heist, R.S., et al., *Acquired Resistance to Crizotinib in NSCLC with MET Exon 14 Skipping*. *J Thorac Oncol*, 2016. **11**(8): p. 1242-1245.
110. Ou, S.-H.I., et al., *Emergence of Preexisting MET Y1230C Mutation as a Resistance Mechanism to Crizotinib in NSCLC with MET Exon 14 Skipping*. *Journal of thoracic oncology : official publication of the International Association for the Study of Lung Cancer*, 2017. **12**(1): p. 137-140.
111. Dong, H.J., et al., *Response and acquired resistance to crizotinib in Chinese patients with lung adenocarcinomas harboring MET Exon 14 splicing alternations*. *Lung Cancer*, 2016. **102**: p. 118-121.
112. Lu, X., et al., *MET Exon 14 Mutation Encodes an Actionable Therapeutic Target in Lung Adenocarcinoma*. *Cancer Res*, 2017. **77**(16): p. 4498-4505.
113. Yoshimura, K., et al., *Successful crizotinib monotherapy in EGFR-mutant lung adenocarcinoma with acquired MET amplification after erlotinib therapy*. *Respir Med Case Rep*, 2017. **20**: p. 160-163.
114. Dziadziuszko, R., et al., *An Activating KIT Mutation Induces Crizotinib Resistance in ROS1-Positive Lung Cancer*. *J Thorac Oncol*, 2016. **11**(8): p. 1273-1281.
115. Quintas-Cardama, A., et al., *Outcome of patients with chronic myeloid leukemia with multiple ABL1 kinase domain mutations receiving tyrosine kinase inhibitor therapy*. *Haematologica*, 2011. **96**(6): p. 918-21.
116. Redaelli, S., et al., *Three novel patient-derived BCR/ABL mutants show different sensitivity to second and third generation tyrosine kinase inhibitors*. *American journal of hematology*, 2012. **87**(11): p. E125-8.
117. Jabbour, E., et al., *Characteristics and outcomes of patients with V299L BCR-ABL kinase domain mutation after therapy with tyrosine kinase inhibitors*. *Blood*, 2012. **120**(16): p. 3382-3.
118. Breccia, M., et al., *Sequential development of mutant clones in an imatinib resistant chronic myeloid leukaemia patient following sequential treatment with multiple tyrosine kinase inhibitors: an emerging problem?* *Cancer Chemother Pharmacol*, 2009. **64**(1): p. 195-7.
119. Jabbour, E., et al., *Results of allogeneic hematopoietic stem cell transplantation for chronic myelogenous leukemia patients who failed tyrosine kinase inhibitors after developing BCR-ABL1 kinase domain mutations*. *Blood*, 2011. **117**(13): p. 3641-7.

120. Sakai, K., et al., *A novel insertion mutation of K294RGG within BCR-ABL kinase domain confers imatinib resistance: sequential analysis of the clonal evolution in a patient with chronic myeloid leukemia in blast crisis*. *Int J Hematol*, 2011. **93**(2): p. 237-242.
121. Foa, R., et al., *Dasatinib as first-line treatment for adult patients with Philadelphia chromosome-positive acute lymphoblastic leukemia*. *Blood*, 2011. **118**(25): p. 6521-8.
122. Razga, F., et al., *Role of treatment in the appearance and selection of BCR-ABL1 kinase domain mutations*. *Mol Diagn Ther*, 2012. **16**(4): p. 251-9.
123. Ravandi, F., et al., *Long-term follow-up of a phase 2 study of chemotherapy plus dasatinib for the initial treatment of patients with Philadelphia chromosome-positive acute lymphoblastic leukemia*. *Cancer*, 2015. **121**(23): p. 4158-64.
124. Branford, S., et al., *High frequency of point mutations clustered within the adenosine triphosphate-binding region of BCR/ABL in patients with chronic myeloid leukemia or Ph-positive acute lymphoblastic leukemia who develop imatinib (STI571) resistance*. *Blood*, 2002. **99**(9): p. 3472-5.
125. Shah, N.P., et al., *Multiple BCR-ABL kinase domain mutations confer polyclonal resistance to the tyrosine kinase inhibitor imatinib (STI571) in chronic phase and blast crisis chronic myeloid leukemia*. *Cancer Cell*, 2002. **2**(2): p. 117-25.
126. Hochhaus, A., et al., *Molecular and chromosomal mechanisms of resistance to imatinib (STI571) therapy*. *Leukemia*, 2002. **16**(11): p. 2190-6.
127. Branford, S., et al., *Detection of BCR-ABL mutations in patients with CML treated with imatinib is virtually always accompanied by clinical resistance, and mutations in the ATP phosphate-binding loop (P-loop) are associated with a poor prognosis*. *Blood*, 2003. **102**(1): p. 276-83.
128. Al-Ali, H.K., et al., *High incidence of BCR-ABL kinase domain mutations and absence of mutations of the PDGFR and KIT activation loops in CML patients with secondary resistance to imatinib*. *Hematol J*, 2004. **5**(1): p. 55-60.
129. Sorel, N., et al., *Evidence of ABL-kinase domain mutations in highly purified primitive stem cell populations of patients with chronic myelogenous leukemia*. *Biochem Biophys Res Commun*, 2004. **323**(3): p. 728-30.
130. Gruber, F.X., et al., *A novel Bcr-Abl splice isoform is associated with the L248V mutation in CML patients with acquired resistance to imatinib*. *Leukemia*, 2006. **20**(11): p. 2057-60.
131. Jabbour, E., et al., *Long-term outcome of patients with chronic myeloid leukemia treated with second-generation tyrosine kinase inhibitors after imatinib failure is predicted by the in vitro sensitivity of BCR-ABL kinase domain mutations*. *Blood*, 2009. **114**(10): p. 2037-43.
132. Press, R.D., et al., *Determining the rise in BCR-ABL RNA that optimally predicts a kinase domain mutation in patients with chronic myeloid leukemia on imatinib*. *Blood*, 2009. **114**(13): p. 2598-605.
133. Kim, W.S., et al., *Dynamic change of T315I BCR-ABL kinase domain mutation in Korean chronic myeloid leukaemia patients during treatment with Abl tyrosine kinase inhibitors*. *Hematol Oncol*, 2010. **28**(2): p. 82-8.
134. Markose, P., et al., *Spectrum of BCR-ABL kinase domain mutations in patients with chronic myeloid leukemia from India with suspected resistance to imatinib-mutations are rare and have different distributions*. *Leuk Lymphoma*, 2009. **50**(12): p. 2092-5.
135. Rajappa, S., et al., *Kinase domain mutations and responses to dose escalation in chronic myeloid leukemia resistant to standard dose imatinib mesylate*. *Leuk Lymphoma*, 2010. **51**(1): p. 79-84.
136. Sharma, P., et al., *Mutations in ABL kinase domain are associated with inferior progression-free survival*. *Leuk Lymphoma*, 2010. **51**(6): p. 1072-8.
137. Manrique Arechavaleta, G., et al., *Rapid and sensitive allele-specific (AS)-RT-PCR assay for detection of T315I mutation in chronic myeloid leukemia patients treated with tyrosine-kinase inhibitors*. *Clin Exp Med*, 2011. **11**(1): p. 55-9.
138. Martin, S.E., et al., *Chronic myeloid leukemia with e19a2 atypical transcript: early imatinib resistance and complete response to dasatinib*. *Cancer Genet Cytogenet*, 2010. **201**(2): p. 133-4.
139. Qin, Y., et al., *Characteristics of BCR-ABL kinase domain point mutations in Chinese imatinib-resistant chronic myeloid leukemia patients*. *Ann Hematol*, 2011. **90**(1): p. 47-52.
140. Gruber, F.X., et al., *BCR-ABL isoforms associated with intrinsic or acquired resistance to imatinib: more heterogeneous than just ABL kinase domain point mutations?* *Med Oncol*, 2012. **29**(1): p. 219-26.
141. Ono, T., et al., *BCR-ABL1 mutations in patients with imatinib-resistant Philadelphia chromosome-positive leukemia by use of the PCR-Invader assay*. *Leuk Res*, 2011. **35**(5): p. 598-603.
142. Bengio, R.M., et al., *Clinical outcome of chronic myeloid leukemia imatinib-resistant patients: do BCR-ABL kinase domain mutations affect patient survival? First multicenter Argentinean study*. *Leuk Lymphoma*, 2011. **52**(9): p. 1720-6.

143. Chang, B.H., et al., *Imatinib resistant BCR-ABL1 mutations at relapse in children with Ph+ ALL: a Children's Oncology Group (COG) study*. *Br J Haematol*, 2012. **157**(4): p. 507-10.
144. Razga, F., et al., *Analysis of mutations in the BCR-ABL1 kinase domain, using direct sequencing: detection of the T315I mutation in bone marrow CD34+ cells of a patient with chronic myelogenous leukemia 6 months prior to its emergence in peripheral blood*. *Mol Diagn Ther*, 2012. **16**(3): p. 163-6.
145. Tiribelli, M., et al., *Impact of BCR-ABL mutations on response to dasatinib after imatinib failure in elderly patients with chronic-phase chronic myeloid leukemia*. *Ann Hematol*, 2013. **92**(2): p. 179-83.
146. Elias, M.H., et al., *Contribution of BCR-ABL kinase domain mutations to imatinib mesylate resistance in Philadelphia chromosome positive Malaysian chronic myeloid leukemia patients*. *Hematol Rep*, 2012. **4**(4): p. e23.
147. Marce, S., et al., *Frequency of ABL gene mutations in chronic myeloid leukemia patients resistant to imatinib and results of treatment switch to second-generation tyrosine kinase inhibitors*. *Med Clin (Barc)*, 2013. **141**(3): p. 95-9.
148. Chahardouli, B., et al., *Detection of BCR-ABL kinase domain mutations in patients with chronic myeloid leukemia on imatinib*. *Hematology*, 2013. **18**(6): p. 328-33.
149. Parker, W.T., et al., *BCR-ABL1 kinase domain mutations may persist at very low levels for many years and lead to subsequent TKI resistance*. *Br J Cancer*, 2013. **109**(6): p. 1593-8.
150. Elias, M.H., et al., *BCR-ABL kinase domain mutations, including 2 novel mutations in imatinib resistant Malaysian chronic myeloid leukemia patients—Frequency and clinical outcome*. *Leuk Res*, 2014. **38**(4): p. 454-9.
151. Rostami, G., et al., *Incidence and clinical importance of BCR-ABL1 mutations in Iranian patients with chronic myeloid leukemia on imatinib*. *J Hum Genet*, 2015. **60**(5): p. 253-8.
152. Li, C., et al., *E255K and G250E mutation appearing in a patient with e19a2 chronic myeloid leukemia resistant to imatinib*. *Clin Lab*, 2015. **61**(1-2): p. 183-6.
153. Rejali, L., et al., *Characterizing of Four Common BCR-ABL Kinase Domain Mutations (T315I, Y253H, M351T and E255K) in Iranian Chronic Myelogenous Leukemia Patients With Imatinib Resistance*. *Iran J Cancer Prev*, 2015. **8**(3): p. e2334.
154. Verma, D., et al., *Complexity of BCR-ABL kinase domain mutations during the course of therapy with tyrosine kinase inhibitors in chronic myeloid leukemia*. *Am J Hematol*, 2009. **84**(4): p. 256-7.
155. Hayette, S., et al., *Longitudinal studies of SRC family kinases in imatinib- and dasatinib-resistant chronic myelogenous leukemia patients*. *Leuk Res*, 2011. **35**(1): p. 38-43.
156. Strhakova, L., et al., *Use of direct sequencing for detection of mutations in the BCR-ABL kinase domain in Slovak patients with chronic myeloid leukemia*. *Neoplasma*, 2011. **58**(6): p. 548-53.
157. Sacha, T., et al., *[ABL domain kinase point mutations as a cause of resistance to therapy of patients with chronic myeloid leukemia with tyrosine kinase inhibitors. Single center experience]*. *Przegl Lek*, 2011. **68**(5): p. 253-7.
158. Ferri, C., et al., *Early detection and quantification of mutations in the tyrosine kinase domain of chimerical BCR-ABL1 gene combining high-resolution melting analysis and mutant-allele specific quantitative polymerase chain reaction*. *Leuk Lymphoma*, 2013. **54**(3): p. 598-606.
159. Cortes, J.E., et al., *Ponatinib in refractory Philadelphia chromosome-positive leukemias*. *N Engl J Med*, 2012. **367**(22): p. 2075-88.
160. Khorashad, J.S., et al., *BCR-ABL1 compound mutations in tyrosine kinase inhibitor-resistant CML: frequency and clonal relationships*. *Blood*, 2013. **121**(3): p. 489-98.
161. Furman, R.R., et al., *Ibrutinib resistance in chronic lymphocytic leukemia*. *N Engl J Med*, 2014. **370**(24): p. 2352-4.
162. Woyach, J.A., et al., *Resistance mechanisms for the Bruton's tyrosine kinase inhibitor ibrutinib*. *N Engl J Med*, 2014. **370**(24): p. 2286-94.
163. Chiron, D., et al., *Cell-cycle reprogramming for PI3K inhibition overrides a relapse-specific C481S BTK mutation revealed by longitudinal functional genomics in mantle cell lymphoma*. *Cancer Discov*, 2014. **4**(9): p. 1022-35.
164. Maddocks, K.J., et al., *Etiology of Ibrutinib Therapy Discontinuation and Outcomes in Patients With Chronic Lymphocytic Leukemia*. *JAMA Oncol*, 2015. **1**(1): p. 80-7.
165. Burger, J.A., et al., *Clonal evolution in patients with chronic lymphocytic leukaemia developing resistance to BTK inhibition*. *Nat Commun*, 2016. **7**: p. 11589.
166. Sharma, S., et al., *Identification of a structurally novel BTK mutation that drives ibrutinib resistance in CLL*. *Oncotarget*, 2016. **7**(42): p. 68833-68841.
167. Ahn, I.E., et al., *Clonal evolution leading to ibrutinib resistance in chronic lymphocytic leukemia*. *Blood*, 2017. **129**(11): p. 1469-1479.

168. Moore, A.S., et al., *Selective FLT3 inhibition of FLT3-ITD+ acute myeloid leukaemia resulting in secondary D835Y mutation: a model for emerging clinical resistance patterns*. *Leukemia*, 2012. **26**(7): p. 1462-70.
169. Smith, C.C., et al., *Validation of ITD mutations in FLT3 as a therapeutic target in human acute myeloid leukaemia*. *Nature*, 2012. **485**(7397): p. 260-3.
170. Albers, C., et al., *The secondary FLT3-ITD F691L mutation induces resistance to AC220 in FLT3-ITD+ AML but retains in vitro sensitivity to PKC412 and Sunitinib*. *Leukemia*, 2013. **27**(6): p. 1416-8.
171. Man, C.H., et al., *Sorafenib treatment of FLT3-ITD(+) acute myeloid leukemia: favorable initial outcome and mechanisms of subsequent nonresponsiveness associated with the emergence of a D835 mutation*. *Blood*, 2012. **119**(22): p. 5133-43.
172. Baker, S.D., et al., *Emergence of polyclonal FLT3 tyrosine kinase domain mutations during sequential therapy with sorafenib and sunitinib in FLT3-ITD-positive acute myeloid leukemia*. *Clin Cancer Res*, 2013. **19**(20): p. 5758-68.
173. Zheng, S., et al., *KIT and BRAF heterogeneous mutations in gastrointestinal stromal tumors after secondary imatinib resistance*. *Gastric Cancer*, 2015. **18**(4): p. 796-802.
174. Debiec-Rychter, M., et al., *Mechanisms of resistance to imatinib mesylate in gastrointestinal stromal tumors and activity of the PKC412 inhibitor against imatinib-resistant mutants*. *Gastroenterology*, 2005. **128**(2): p. 270-9.
175. Antonescu, C.R., et al., *Acquired resistance to imatinib in gastrointestinal stromal tumor occurs through secondary gene mutation*. *Clin Cancer Res*, 2005. **11**(11): p. 4182-90.
176. Wardelmann, E., et al., *Polyclonal evolution of multiple secondary KIT mutations in gastrointestinal stromal tumors under treatment with imatinib mesylate*. *Clin Cancer Res*, 2006. **12**(6): p. 1743-9.
177. Heinrich, M.C., et al., *Molecular correlates of imatinib resistance in gastrointestinal stromal tumors*. *J Clin Oncol*, 2006. **24**(29): p. 4764-74.
178. Desai, J., et al., *Clonal evolution of resistance to imatinib in patients with metastatic gastrointestinal stromal tumors*. *Clin Cancer Res*, 2007. **13**(18 Pt 1): p. 5398-405.
179. Sym, S.J., et al., *Surgical intervention following imatinib treatment in patients with advanced gastrointestinal stromal tumors (GISTs)*. *J Surg Oncol*, 2008. **98**(1): p. 27-33.
180. Chen, L.L., et al., *Evolution from heterozygous to homozygous KIT mutation in gastrointestinal stromal tumor correlates with the mechanism of mitotic nondisjunction and significant tumor progression*. *Mod Pathol*, 2008. **21**(7): p. 826-36.
181. Liegl, B., et al., *Heterogeneity of kinase inhibitor resistance mechanisms in GIST*. *J Pathol*, 2008. **216**(1): p. 64-74.
182. Liegl, B., et al., *Rhabdomyosarcomatous differentiation in gastrointestinal stromal tumors after tyrosine kinase inhibitor therapy: a novel form of tumor progression*. *Am J Surg Pathol*, 2009. **33**(2): p. 218-26.
183. Heinrich, M.C., et al., *Primary and secondary kinase genotypes correlate with the biological and clinical activity of sunitinib in imatinib-resistant gastrointestinal stromal tumor*. *J Clin Oncol*, 2008. **26**(33): p. 5352-9.
184. Bauer, S., et al., *Proapoptotic activity of bortezomib in gastrointestinal stromal tumor cells*. *Cancer Res*, 2010. **70**(1): p. 150-9.
185. Revheim, M.E., et al., *Establishment and characterization of a human gastrointestinal stromal tumour (GIST) xenograft in athymic nude mice*. *Anticancer Res*, 2009. **29**(11): p. 4331-6.
186. Wang, C.M., et al., *Molecular mechanisms of secondary imatinib resistance in patients with gastrointestinal stromal tumors*. *J Cancer Res Clin Oncol*, 2010. **136**(7): p. 1065-71.
187. Antonescu, C.R., et al., *Dedifferentiation in gastrointestinal stromal tumor to an anaplastic KIT-negative phenotype: a diagnostic pitfall: morphologic and molecular characterization of 8 cases occurring either de novo or after imatinib therapy*. *Am J Surg Pathol*, 2013. **37**(3): p. 385-92.
188. Gao, J., et al., *Secondary mutations of c-KIT contribute to acquired resistance to imatinib and decrease efficacy of sunitinib in Chinese patients with gastrointestinal stromal tumors*. *Med Oncol*, 2013. **30**(2): p. 522.
189. Kang, G., et al., *Detection of KIT and PDGFRA mutations in the plasma of patients with gastrointestinal stromal tumor*. *Target Oncol*, 2015. **10**(4): p. 597-601.
190. Heydt, C., et al., *Massively parallel sequencing fails to detect minor resistant subclones in tissue samples prior to tyrosine kinase inhibitor therapy*. *BMC Cancer*, 2015. **15**: p. 291.
191. Spitaleri, G., et al., *Inactivity of imatinib in gastrointestinal stromal tumors (GISTs) harboring a KIT activation-loop domain mutation (exon 17 mutation pN822K)*. *Onco Targets Ther*, 2015. **8**: p. 1997-2003.
192. Wada, N., et al., *Detecting Secondary C-KIT Mutations in the Peripheral Blood of Patients with Imatinib-Resistant Gastrointestinal Stromal Tumor*. *Oncology*, 2016. **90**(2): p. 112-7.
193. Takahashi, T., et al., *Genomic and transcriptomic analysis of imatinib resistance in gastrointestinal stromal tumors*. *Genes Chromosomes Cancer*, 2017. **56**(4): p. 303-313.

194. Sugase, T., et al., *Surgical resection of recurrent gastrointestinal stromal tumor after interruption of long-term nilotinib therapy*. *Surg Case Rep*, 2016. **2**(1): p. 137.
195. Kikuchi, H., et al., *Surgical intervention for imatinib and sunitinib-resistant gastrointestinal stromal tumors*. *Int J Clin Oncol*, 2011. **16**(6): p. 741-5.
196. Hatzivassiliou, G., et al., *ERK inhibition overcomes acquired resistance to MEK inhibitors*. *Mol Cancer Ther*, 2012. **11**(5): p. 1143-54.
197. Hirota, S., et al., *Gain-of-function mutations of platelet-derived growth factor receptor alpha gene in gastrointestinal stromal tumors*. *Gastroenterology*, 2003. **125**(3): p. 660-7.
198. Heinrich, M.C., et al., *Kinase mutations and imatinib response in patients with metastatic gastrointestinal stromal tumor*. *J Clin Oncol*, 2003. **21**(23): p. 4342-9.
199. Xu, X., et al., *Gastrointestinal stromal tumor with structures resembling intracytoplasmic lumina*. *Ultrastruct Pathol*, 2010. **34**(5): p. 301-6.
200. Cassier, P.A., et al., *Outcome of patients with platelet-derived growth factor receptor alpha-mutated gastrointestinal stromal tumors in the tyrosine kinase inhibitor era*. *Clin Cancer Res*, 2012. **18**(16): p. 4458-64.
201. Yoo, C., et al., *Efficacy of Imatinib in Patients with Platelet-Derived Growth Factor Receptor Alpha-Mutated Gastrointestinal Stromal Tumors*. *Cancer Res Treat*, 2016. **48**(2): p. 546-52.
202. Farag, S., et al., *Clinical characteristics and treatment outcome in a large multicentre observational cohort of PDGFRA exon 18 mutated gastrointestinal stromal tumour patients*. *Eur J Cancer*, 2017. **76**: p. 76-83.
203. Rizos, H., et al., *BRAF inhibitor resistance mechanisms in metastatic melanoma: spectrum and clinical impact*. *Clin Cancer Res*, 2014. **20**(7): p. 1965-77.
204. Kwong, L.N., et al., *Co-clinical assessment identifies patterns of BRAF inhibitor resistance in melanoma*. *The Journal of clinical investigation*, 2015. **125**(4): p. 1459-70.
205. Hoogstraat, M., et al., *Detailed imaging and genetic analysis reveal a secondary BRAF(L505H) resistance mutation and extensive inpatient heterogeneity in metastatic BRAF mutant melanoma patients treated with vemurafenib*. *Pigment Cell Melanoma Res*, 2015. **28**(3): p. 318-23.
206. Monsma, D.J., et al., *Melanoma patient derived xenografts acquire distinct Vemurafenib resistance mechanisms*. *Am J Cancer Res*, 2015. **5**(4): p. 1507-18.
207. Mologni, L., et al., *Concomitant BCORL1 and BRAF Mutations in Vemurafenib-Resistant Melanoma Cells*. *Neoplasia*, 2018. **20**(5): p. 467-477.
208. Cho, J., et al., *Emergence of CTNNB1 mutation at acquired resistance to KIT inhibitor in metastatic melanoma*. *Clin Transl Oncol*, 2017. **19**(10): p. 1247-1252.
209. Zaretsky, J.M., et al., *Mutations Associated with Acquired Resistance to PD-1 Blockade in Melanoma*. *N Engl J Med*, 2016. **375**(9): p. 819-29.
210. Trunzer, K., et al., *Pharmacodynamic effects and mechanisms of resistance to vemurafenib in patients with metastatic melanoma*. *J Clin Oncol*, 2013. **31**(14): p. 1767-74.
211. Long, G.V., et al., *Increased MAPK reactivation in early resistance to dabrafenib/trametinib combination therapy of BRAF-mutant metastatic melanoma*. *Nature communications*, 2014. **5**: p. 5694.
212. Rizos, H., et al., *BRAF inhibitor resistance mechanisms in metastatic melanoma: spectrum and clinical impact*. *Clinical cancer research : an official journal of the American Association for Cancer Research*, 2014. **20**(7): p. 1965-77.
213. Nazarian, R., et al., *Melanomas acquire resistance to B-RAF(V600E) inhibition by RTK or N-RAS upregulation*. *Nature*, 2010. **468**(7326): p. 973-7.
214. Brinkhuizen, T., et al., *Acquired resistance to the Hedgehog pathway inhibitor vismodegib due to smoothed mutations in treatment of locally advanced basal cell carcinoma*. *J Am Acad Dermatol*, 2014. **71**(5): p. 1005-8.
215. Pricl, S., et al., *Smoothed (SMO) receptor mutations dictate resistance to vismodegib in basal cell carcinoma*. *Mol Oncol*, 2015. **9**(2): p. 389-97.
216. Sharpe, H.J., et al., *Genomic analysis of smoothed inhibitor resistance in basal cell carcinoma*. *Cancer Cell*, 2015. **27**(3): p. 327-41.
217. Atwood, S.X., et al., *Smoothed variants explain the majority of drug resistance in basal cell carcinoma*. *Cancer Cell*, 2015. **27**(3): p. 342-53.
218. Li, S., et al., *Endocrine-therapy-resistant ESR1 variants revealed by genomic characterization of breast-cancer-derived xenografts*. *Cell Rep*, 2013. **4**(6): p. 1116-30.
219. Robinson, D.R., et al., *Activating ESR1 mutations in hormone-resistant metastatic breast cancer*. *Nat Genet*, 2013. **45**(12): p. 1446-51.

220. Toy, W., et al., *ESR1 ligand-binding domain mutations in hormone-resistant breast cancer*. Nat Genet, 2013. **45**(12): p. 1439-45.
221. Merenbakh-Lamin, K., et al., *D538G mutation in estrogen receptor-alpha: A novel mechanism for acquired endocrine resistance in breast cancer*. Cancer Res, 2013. **73**(23): p. 6856-64.
222. Guttery, D.S., et al., *Noninvasive detection of activating estrogen receptor 1 (ESR1) mutations in estrogen receptor-positive metastatic breast cancer*. Clin Chem, 2015. **61**(7): p. 974-82.
223. Takeshita, T., et al., *Droplet digital polymerase chain reaction assay for screening of ESR1 mutations in 325 breast cancer specimens*. Transl Res, 2015. **166**(6): p. 540-553 e2.
224. Niu, J., et al., *Incidence and clinical significance of ESR1 mutations in heavily pretreated metastatic breast cancer patients*. Onco Targets Ther, 2015. **8**: p. 3323-8.
225. Bardia, A., et al., *Metastatic Breast Cancer With ESR1 Mutation: Clinical Management Considerations From the Molecular and Precision Medicine (MAP) Tumor Board at Massachusetts General Hospital*. Oncologist, 2016. **21**(9): p. 1035-40.
226. Yanagawa, T., et al., *Detection of ESR1 mutations in plasma and tumors from metastatic breast cancer patients using next-generation sequencing*. Breast Cancer Res Treat, 2017. **163**(2): p. 231-240.
227. Rodrik-Outmezguine, V.S., et al., *Overcoming mTOR resistance mutations with a new-generation mTOR inhibitor*. Nature, 2016. **534**(7606): p. 272-6.
228. Chen, E.J., et al., *Abiraterone treatment in castration-resistant prostate cancer selects for progesterone responsive mutant androgen receptors*. Clin Cancer Res, 2015. **21**(6): p. 1273-80.
229. Romanel, A., et al., *Plasma AR and abiraterone-resistant prostate cancer*. Sci Transl Med, 2015. **7**(312): p. 312re10.
230. Cullig, Z., et al., *Mutant androgen receptor detected in an advanced-stage prostatic carcinoma is activated by adrenal androgens and progesterone*. Mol Endocrinol, 1993. **7**(12): p. 1541-50.
231. Azad, A.A., et al., *Androgen Receptor Gene Aberrations in Circulating Cell-Free DNA: Biomarkers of Therapeutic Resistance in Castration-Resistant Prostate Cancer*. Clin Cancer Res, 2015. **21**(10): p. 2315-24.
232. Sperger, J.M., et al., *Integrated Analysis of Multiple Biomarkers from Circulating Tumor Cells Enabled by Exclusion-Based Analyte Isolation*. Clin Cancer Res, 2017. **23**(3): p. 746-756.
233. Taplin, M.E., et al., *Mutation of the androgen-receptor gene in metastatic androgen-independent prostate cancer*. N Engl J Med, 1995. **332**(21): p. 1393-8.
234. Taplin, M.E., et al., *Androgen receptor mutations in androgen-independent prostate cancer: Cancer and Leukemia Group B Study 9663*. J Clin Oncol, 2003. **21**(14): p. 2673-8.
235. Ceraline, J., et al., *Constitutive activation of the androgen receptor by a point mutation in the hinge region: a new mechanism for androgen-independent growth in prostate cancer*. Int J Cancer, 2004. **108**(1): p. 152-7.
236. Steinkamp, M.P., et al., *Treatment-dependent androgen receptor mutations in prostate cancer exploit multiple mechanisms to evade therapy*. Cancer Res, 2009. **69**(10): p. 4434-42.
237. Taplin, M.E., et al., *Selection for androgen receptor mutations in prostate cancers treated with androgen antagonist*. Cancer Res, 1999. **59**(11): p. 2511-5.
238. Diamond, J.R., et al., *Initial clinical sensitivity and acquired resistance to MET inhibition in MET-mutated papillary renal cell carcinoma*. J Clin Oncol, 2013. **31**(16): p. e254-8.
239. Wagle, N., et al., *Response and acquired resistance to everolimus in anaplastic thyroid cancer*. N Engl J Med, 2014. **371**(15): p. 1426-33.
240. Yauch, R.L., et al., *Smoothed mutation confers resistance to a Hedgehog pathway inhibitor in medulloblastoma*. Science, 2009. **326**(5952): p. 572-4.
241. Carlino, M.S., et al., *Antiproliferative effects of continued mitogen-activated protein kinase pathway inhibition following acquired resistance to BRAF and/or MEK inhibition in melanoma*. Molecular cancer therapeutics, 2013. **12**(7): p. 1332-42.
242. Wagle, N., et al., *Dissecting therapeutic resistance to RAF inhibition in melanoma by tumor genomic profiling*. J Clin Oncol, 2011. **29**(22): p. 3085-96.
243. Van Allen, E.M., et al., *The genetic landscape of clinical resistance to RAF inhibition in metastatic melanoma*. Cancer discovery, 2014. **4**(1): p. 94-109.
244. Wheler, J., et al., *Next generation sequencing of exceptional responders with BRAF-mutant melanoma: implications for sensitivity and resistance*. BMC Cancer, 2015. **15**: p. 61.
245. Gray, E.S., et al., *Circulating tumor DNA to monitor treatment response and detect acquired resistance in patients with metastatic melanoma*. Oncotarget, 2015. **6**(39): p. 42008-18.



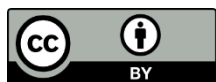

© 2020 by the authors. Submitted for possible open access publication under the terms and conditions of the Creative Commons Attribution (CC BY) license (<http://creativecommons.org/licenses/by/4.0/>).
